# Supplementary material for: Easy recycling of nanoscale Fe2O3-based catalysts for nitroarene reduction to anilines by the pyrolysis of a metallogel
Source: Royal Society of Chemistry journal article supplement (doi:10.1039/d4qi01250j), 2024-01-01
Supplement: d4qi01250j1.pdf [file d4qi01250j1.pdf]

## *Supplementary Material*

### **Easy Recycling of Nanoscale Fe<sub>2</sub>O<sub>3</sub>-Based Catalysts for Nitroarene Reduction to Anilines by Pyrolysis of Metallogel**

Wen-Ting Deng<sup>‡</sup>, Xiang Zhong<sup>‡</sup>, Yang Li, Xin-Jian Jia, Hai-Qing Luo, Xu-Zhong Luo\*

College of Chemistry and Chemical Engineering, Gannan Normal University, Ganzhou,  
341000, China

<sup>‡</sup> Wen-Ting Deng and Xiang Zhong contributed equally to this work.

## **1. General**

### **Materials and Instruments**

All reagents were commercially available and used without further purification. Except triethylamine and dichloromethane were removed water. <sup>1</sup>H spectra were collected on 400 MHz Bruker AVANCE 400 spectrometers. Chemical shifts were reported in ppm. Deuterium reagents was *d*<sup>6</sup>-DMSO. SEM images were collected on FEI quanta 450 instrument. GC-MS were obtained with Shimadzu GCMS-QP 2010SE.

## 2. Synthesis and characterization

### 2.1 The synthesis of gelator 2B-N3.

As shown in Scheme S1, 3-aminopyridine (1.88 g, 20 mmol) and triethylamine (3 mL, 21.55 mmol) were mixed in dichloromethane (50 mL), then slowly added 50 mL dichloromethane solution with (2, 2'-bipyridine)-4, 4'-dicarbonyl dichloride (2.80 g, 10 mmol) to it at 0 °C. After dropping, added triethylamine into it, and gradually stir to raise the temperature to room temperature. After reaction for 7 hours, filtered and washed with dichloromethane, crude product dissolved with hot DMSO, recrystallized with water obtained white solid powder (0.52 g, 14.0 %) - N, N'-di(3-pyridyl)-2, 2'-bipyridine-4, 4'-diformamide (Abbreviated as **2B-N3**) <sup>1</sup>H-NMR (400 MHz, DMSO) 10.91 (d, *J* = 6.6 Hz, 2H), 8.98 (dd, *J* = 13.8, 2.7 Hz, 6H), 8.38 (dd, *J* = 4.7, 1.4 Hz, 2H), 8.29 - 8.20 (m, 2H), 8.05 - 7.96 (m, 2H), 7.46 (dd, *J* = 8.2, 4.7 Hz, 2H) (Figure S1). LC-MS [M+H]<sup>+</sup> calculated for C<sub>22</sub>H<sub>16</sub>N<sub>4</sub>O<sub>2</sub> : m/z 396.13; found: 397.14.

Scheme S1. Synthesis of **2B-N3**

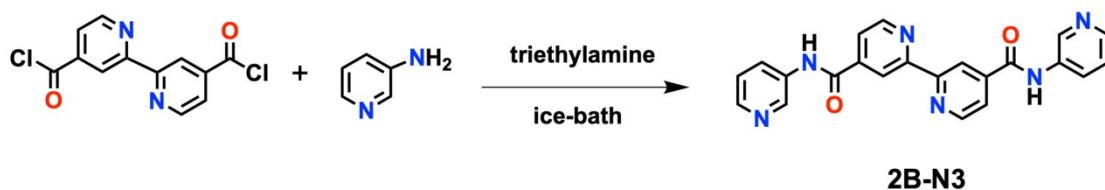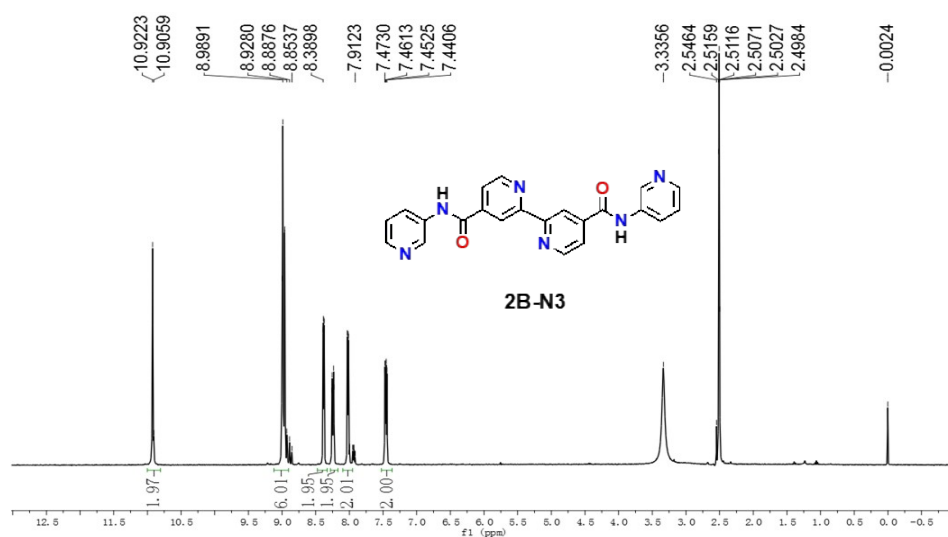

Figure S1. <sup>1</sup>H-NMR spectrum (400 MHz, DMSO) of compound **2B-N3**

### 2.2 The synthesis of metallo gel Fe-2B-N3.

**Table S1.** Determination of gelling property of gelator in different metal ions.

| Gelator | Metal Ion                                       | State    | Metal Ion                         | State |
|---------|-------------------------------------------------|----------|-----------------------------------|-------|
|         | AlCl <sub>3</sub>                               | S        | Mg(NO <sub>3</sub> ) <sub>2</sub> | I     |
|         | Al(NO <sub>3</sub> ) <sub>3</sub>               | S        | MgSO <sub>4</sub>                 | I     |
|         | Al <sub>2</sub> (SO <sub>4</sub> ) <sub>3</sub> | S        | ZnCl <sub>2</sub>                 | I     |
|         | FeCl <sub>3</sub>                               | P        | Zn(NO <sub>3</sub> ) <sub>2</sub> | I     |
|         | <b>Fe(NO<sub>3</sub>)<sub>3</sub></b>           | <b>G</b> | ZnSO <sub>4</sub>                 | I     |
|         | Fe <sub>2</sub> (SO <sub>4</sub> ) <sub>3</sub> | P        | CaCl <sub>2</sub>                 | I     |
|         | FeCl <sub>2</sub>                               | S        | Ca(NO <sub>3</sub> ) <sub>2</sub> | I     |
|         | FeSO <sub>4</sub>                               | I        | SnCl <sub>2</sub>                 | P     |
|         | Fe(NO <sub>3</sub> ) <sub>2</sub>               | S        | SnCl <sub>4</sub>                 | P     |
|         | CuCl <sub>2</sub>                               | I        | Pb(NO <sub>3</sub> ) <sub>2</sub> | I     |
|         | Cu(NO <sub>3</sub> ) <sub>2</sub>               | I        | NiCl <sub>2</sub>                 | I     |
|         | CuSO <sub>4</sub>                               | I        | Ni(NO <sub>3</sub> ) <sub>2</sub> | I     |
|         | Cu(CH <sub>3</sub> COO) <sub>2</sub>            | I        | NiSO <sub>4</sub>                 | I     |
|         | CrCl <sub>3</sub>                               | S        | La(NO <sub>3</sub> ) <sub>3</sub> | P     |
|         | Cr(NO <sub>3</sub> ) <sub>3</sub>               | P        | CeCl <sub>3</sub>                 | P     |
|         | Cr <sub>2</sub> (SO <sub>4</sub> ) <sub>3</sub> | S        | Ce(NO <sub>3</sub> ) <sub>3</sub> | P     |
|         | CdCl <sub>2</sub>                               | I        | SrCl <sub>2</sub>                 | I     |
|         | Cd(NO <sub>3</sub> ) <sub>2</sub>               | I        | Sr(NO <sub>3</sub> ) <sub>2</sub> | I     |
|         | CdSO <sub>4</sub>                               | I        | LiCl                              | I     |
|         | CoCl <sub>2</sub>                               | P        | LiNO <sub>3</sub>                 | I     |
|         | Co(NO <sub>3</sub> ) <sub>2</sub>               | P        | NaCl                              | I     |
|         | CoSO <sub>4</sub>                               | P        | NaNO <sub>3</sub>                 | I     |
|         | MnCl <sub>2</sub>                               | I        | Na <sub>2</sub> SO <sub>4</sub>   | I     |
|         | Mn(NO <sub>3</sub> ) <sub>2</sub>               | I        | KCl                               | I     |
|         | MnSO <sub>4</sub>                               | I        | KNO <sub>3</sub>                  | I     |
|         | MgCl <sub>2</sub>                               | I        | K <sub>2</sub> SO <sub>4</sub>    | I     |
|         | BaCl <sub>2</sub>                               | I        | RbCl                              | I     |
|         | Ba(NO <sub>3</sub> ) <sub>2</sub>               | I        | AgNO <sub>3</sub>                 | I     |

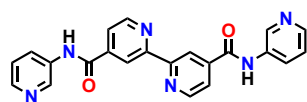**2B-N3**

G = gel; S = solution; P = precipitate; I = insoluble. **2B-N3**: 0.1 mmol; metal ions: 0.1 mol/L

### 2.3 Determination of minimum gel concentration (MGCs) and microstructure.

Weigh amounts of gelator (**2B-N3**) into a small bottle, added 1.0 mL 0.1 mol/L Fe (NO<sub>3</sub>)<sub>3</sub>, heated and ultrasonic them to dissolved, cooled to room temperature. If stable supramolecular metallogel was formed, then added Fe (NO<sub>3</sub>)<sub>3</sub> solution until the stable metallogel cannot be formed. Use the mass ratio of gelator to the volume of Fe<sup>3+</sup> to obtain the minimum gelling concentration of metallogel. The minimum amounts of **2B-N3** dissolved in 1mL Fe (NO<sub>3</sub>)<sub>3</sub> aqueous solution of different concentration necessary for gelatinizing aqueous solution efficiently was assigned to minimum gel concentration (MGCs) of **2B-N3**. As the concentration of Fe (NO<sub>3</sub>)<sub>3</sub> solution increased, the minimum gelling concentration of metallogel also increased, and its microstructure will change due to different concentrations (**Table S2**).

**Table S2.** MGCs at different Fe (NO<sub>3</sub>)<sub>3</sub> concentrations

| Fe (NO <sub>3</sub> ) <sub>3</sub> | MGCs       |
|------------------------------------|------------|
| 0.010 M                            | 12.6 mg/mL |
| 0.020 M                            | 15.3 mg/mL |
| 0.030 M                            | 16.6 mg/mL |
| 0.040 M                            | 18.2 mg/mL |
| 0.050 M                            | 20.1 mg/mL |
| 0.100 M                            | 39.5 mg/mL |
| 0.150 M                            | 53.0 mg/mL |
| 0.200 M                            | 70.1 mg/mL |

**Figure S2.** (a, b, c = 6000x, 3000x, 1500x) Microstructure of areogel of Fe (NO<sub>3</sub>)<sub>3</sub> = 0.1 M

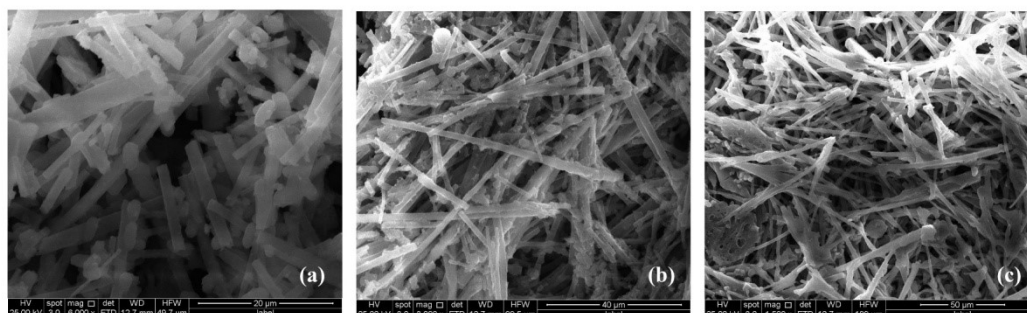

## 2.4 Characterization of catalyst.

**Table S3.** Comparison of catalytic activity of different catalytic materials

| Number | Catalyst | Temperature<br>(°C) | Time (min) | Con. (%) | Sel. (%) |
|--------|----------|---------------------|------------|----------|----------|
| 1      | 600-2h-1 | 80                  | 20         | >99.9    | >99.9    |
| 2      | 700-2h-1 | 80                  | 13         | >99.9    | >99.9    |
| 3      | 800-1h-1 | 80                  | 13         | >99.9    | >99.9    |
| 4      | 800-3h-1 | 80                  | 14         | >99.9    | >99.9    |
| 5      | 900-2h-1 | 80                  | 15         | >99.9    | >99.9    |

**Table S4.** Iron content in different catalytic materials

| Catalytic material  | Iron content (total Fe, wt %) |
|---------------------|-------------------------------|
| 600-2h-1            | 18.31                         |
| 700-2h-1            | 20.92                         |
| <b>L</b> (800-2h-1) | 21.74                         |
| 900-2h-1            | 21.89                         |
| 800-1h-1            | 21.19                         |
| 800-2h-0            | 23.37                         |
| 800-2h-2            | 22.44                         |
| 800-2h-3            | 22.50                         |
| 800-3h-1            | 26.77                         |

## 2.5 TOF calculation method <sup>[1]</sup>.

$$\text{Turnover frequency (TOF)} = \frac{\text{moles of converted substrate}}{\text{moles of Fe} \times \text{reaction time (h)}}$$

## 2.6 <sup>1</sup>H-NMR of the reduced product.

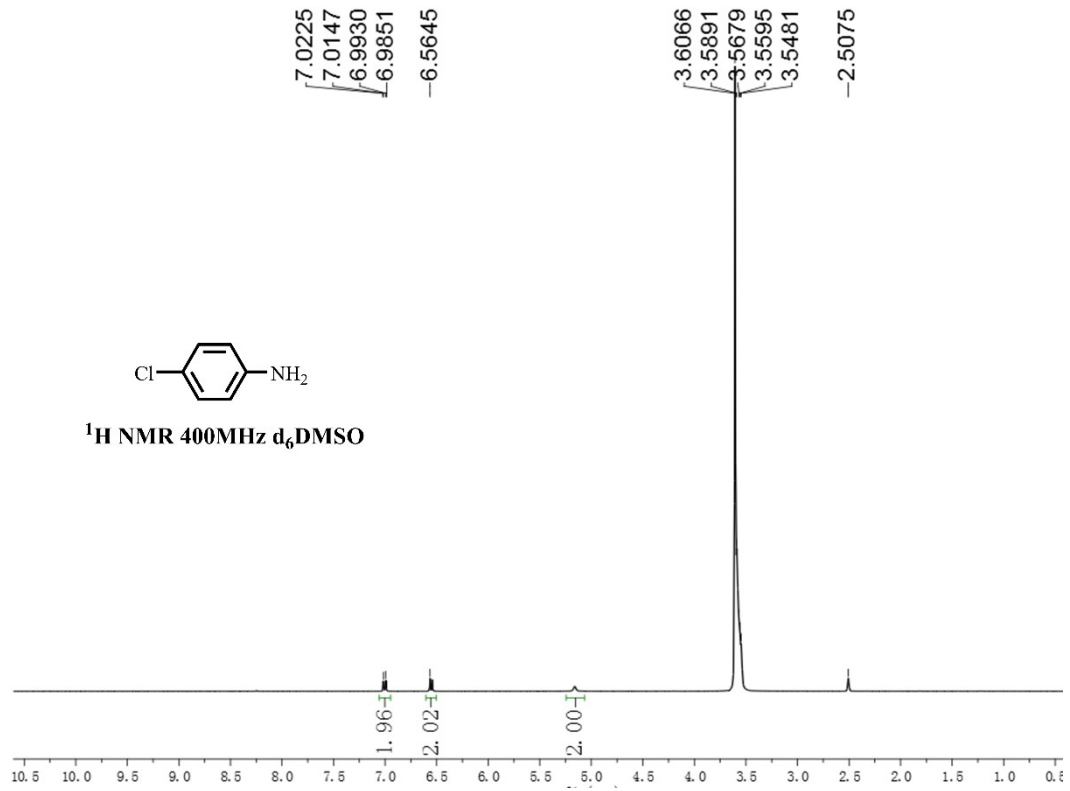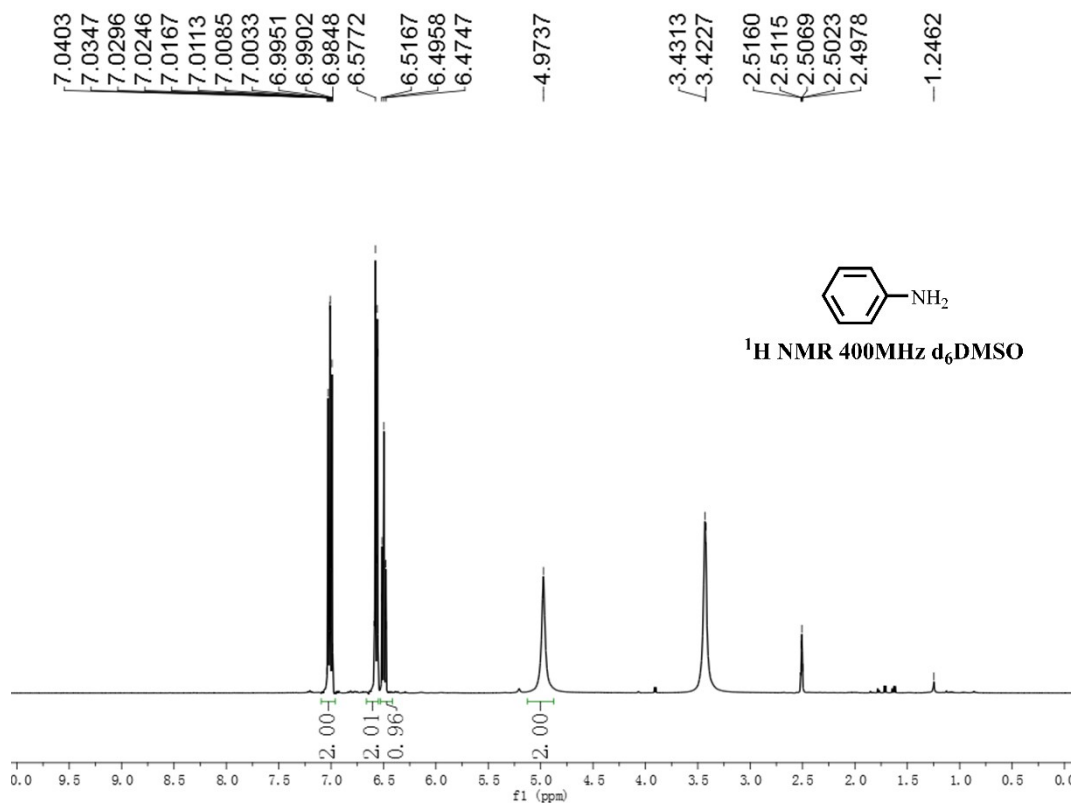

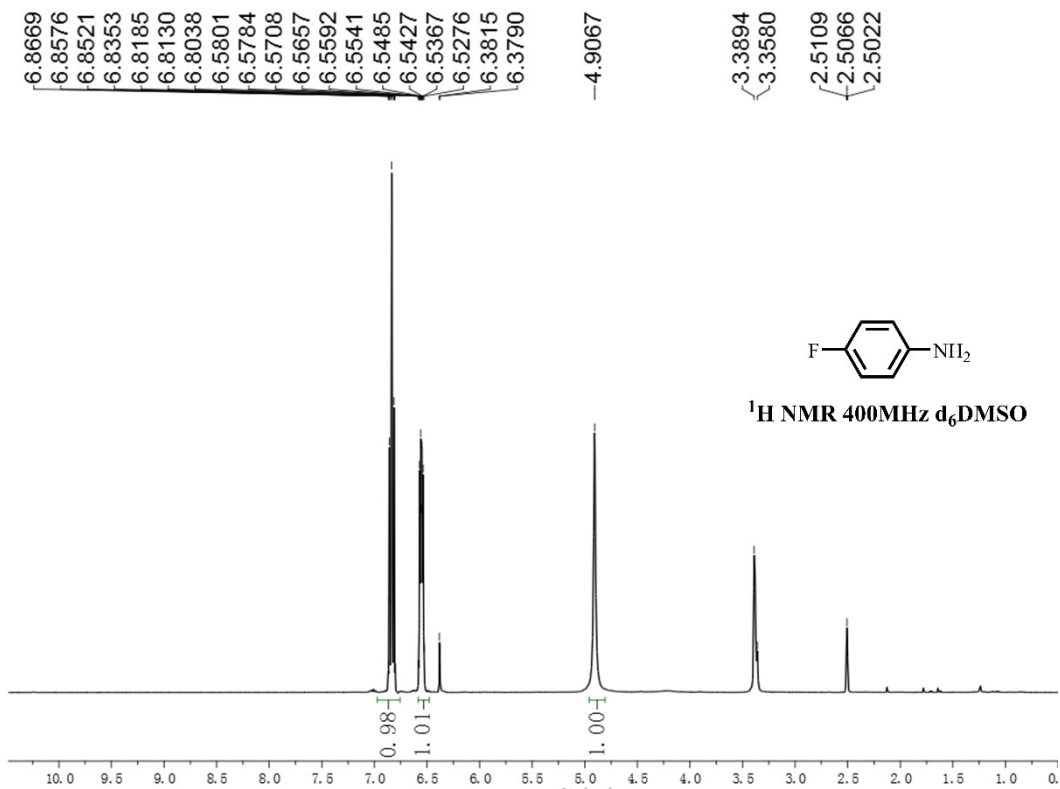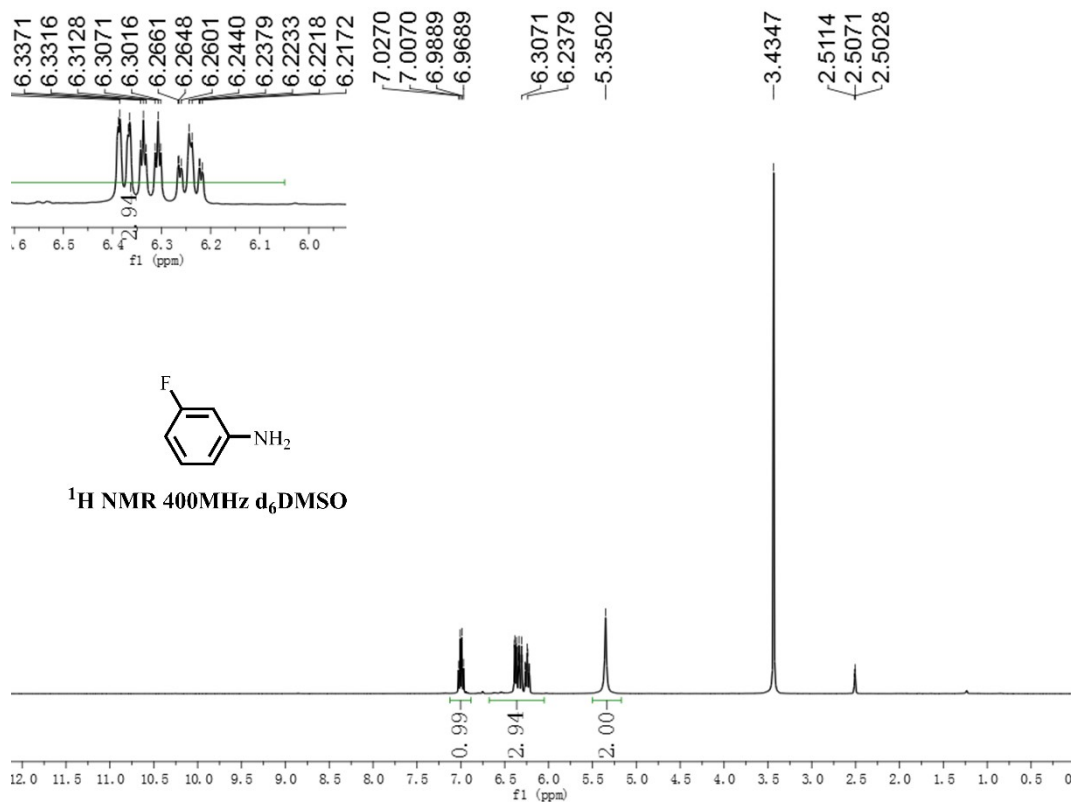

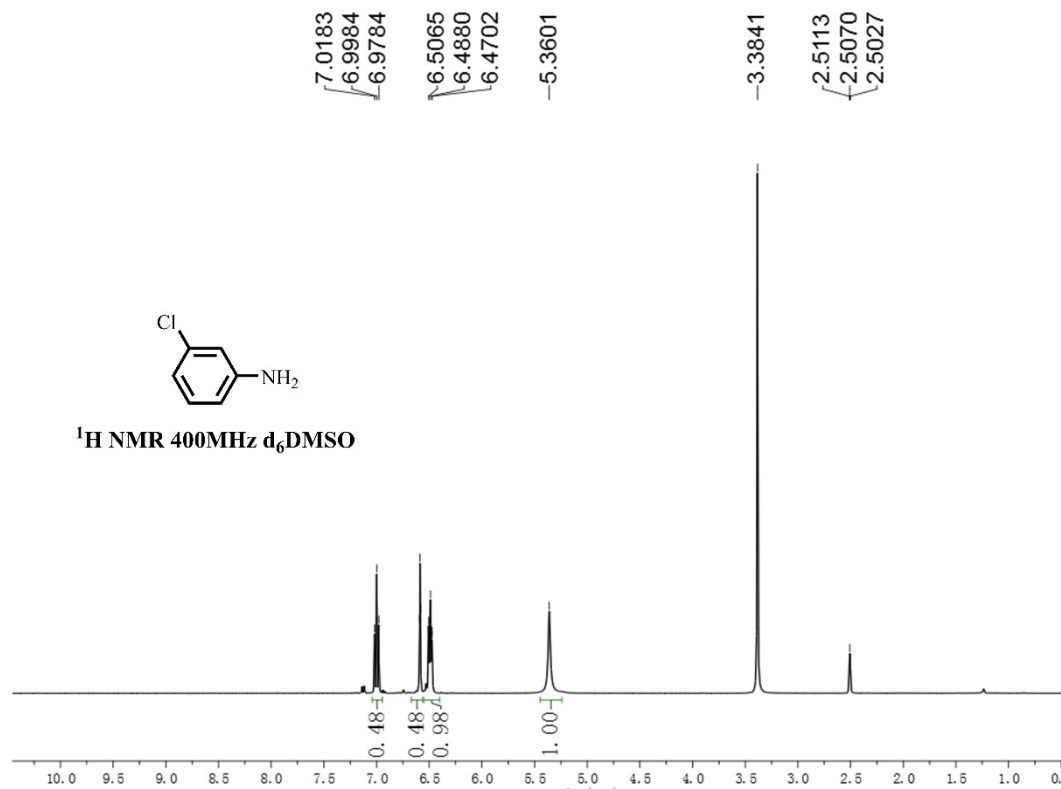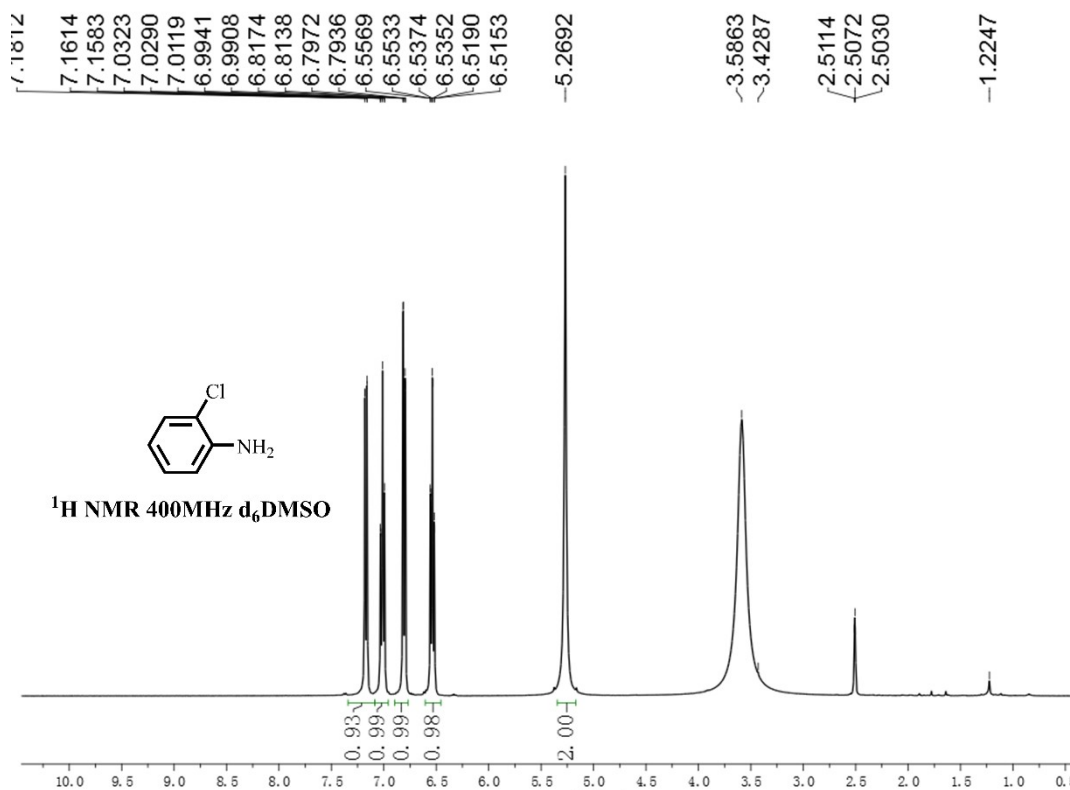



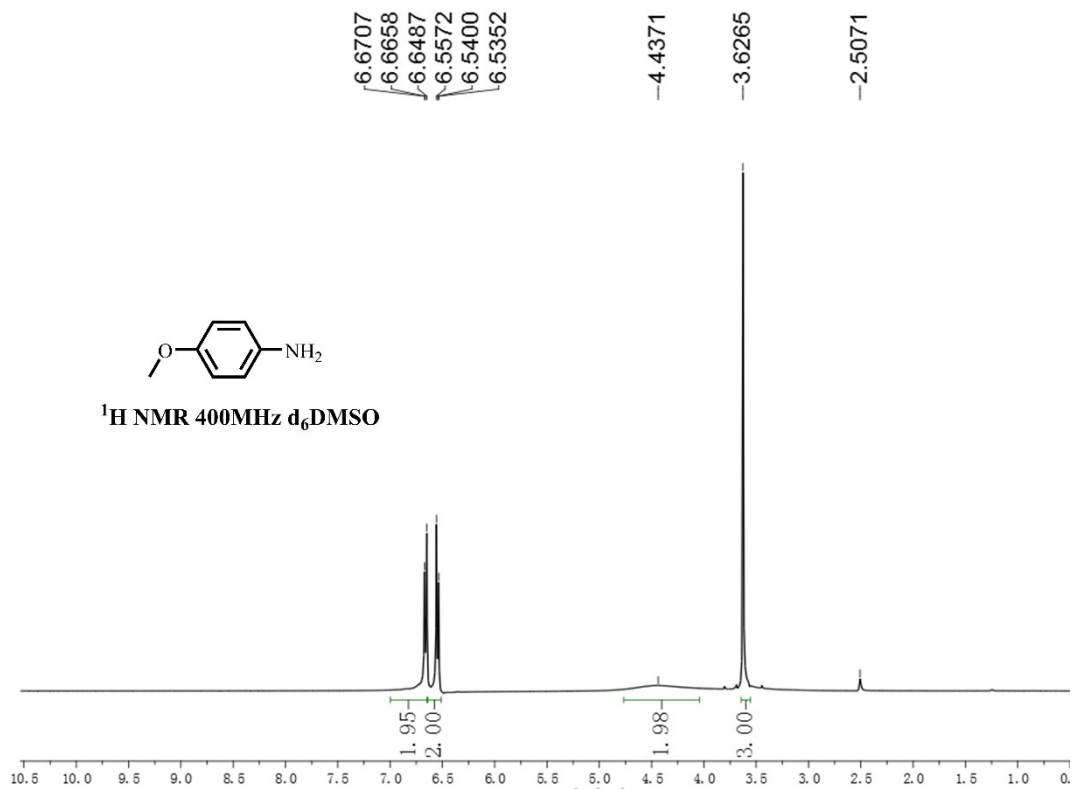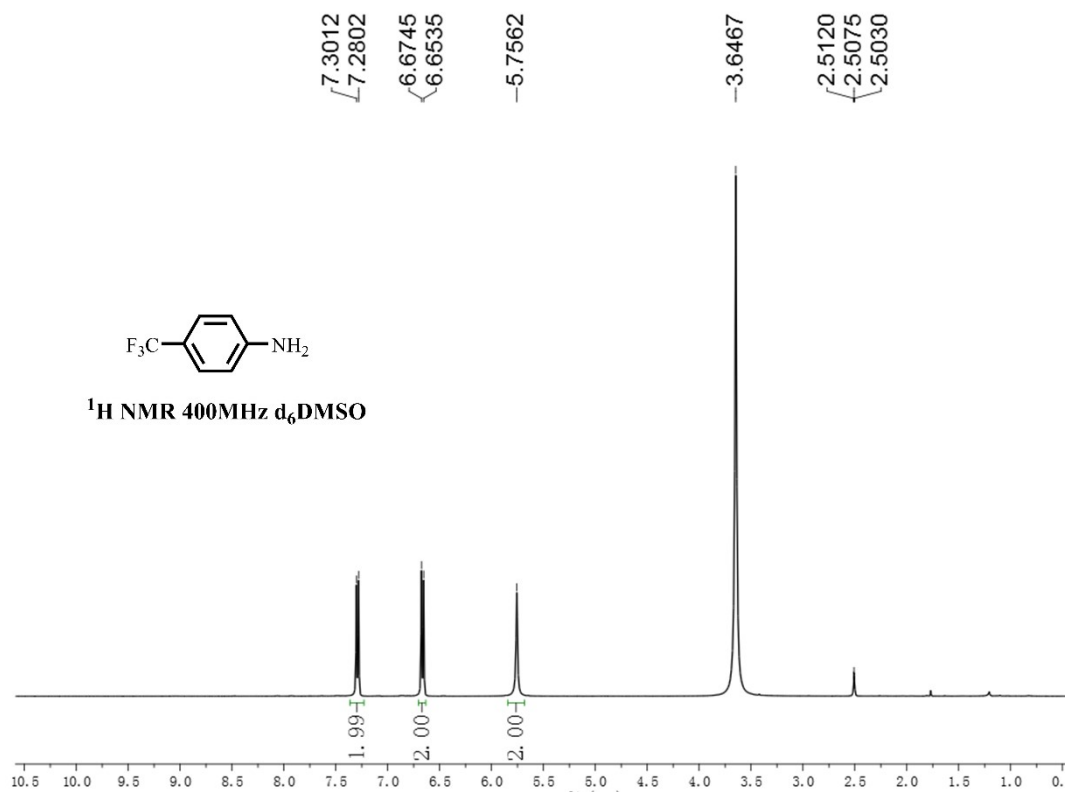

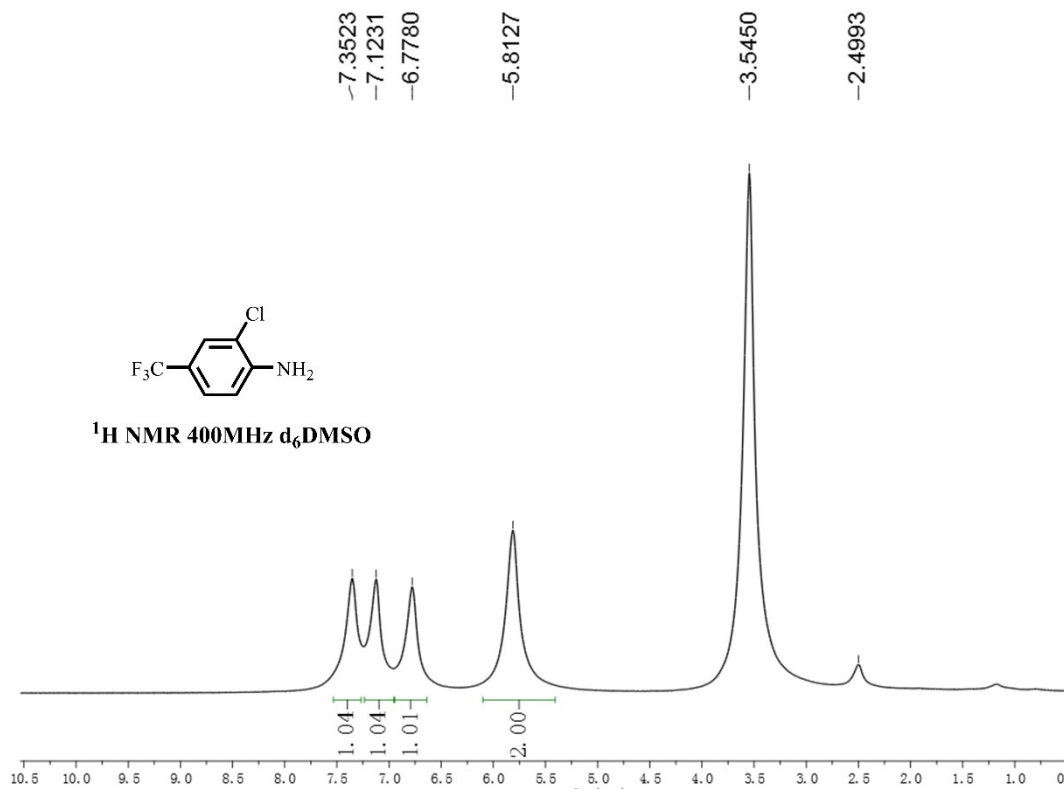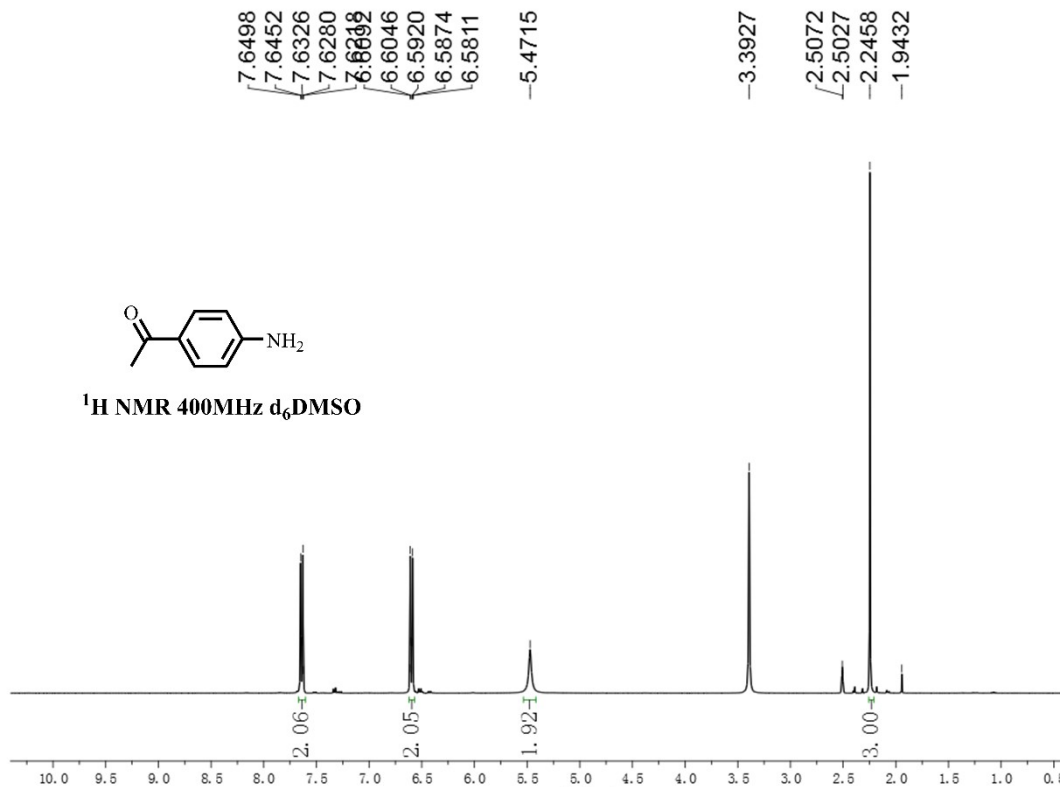

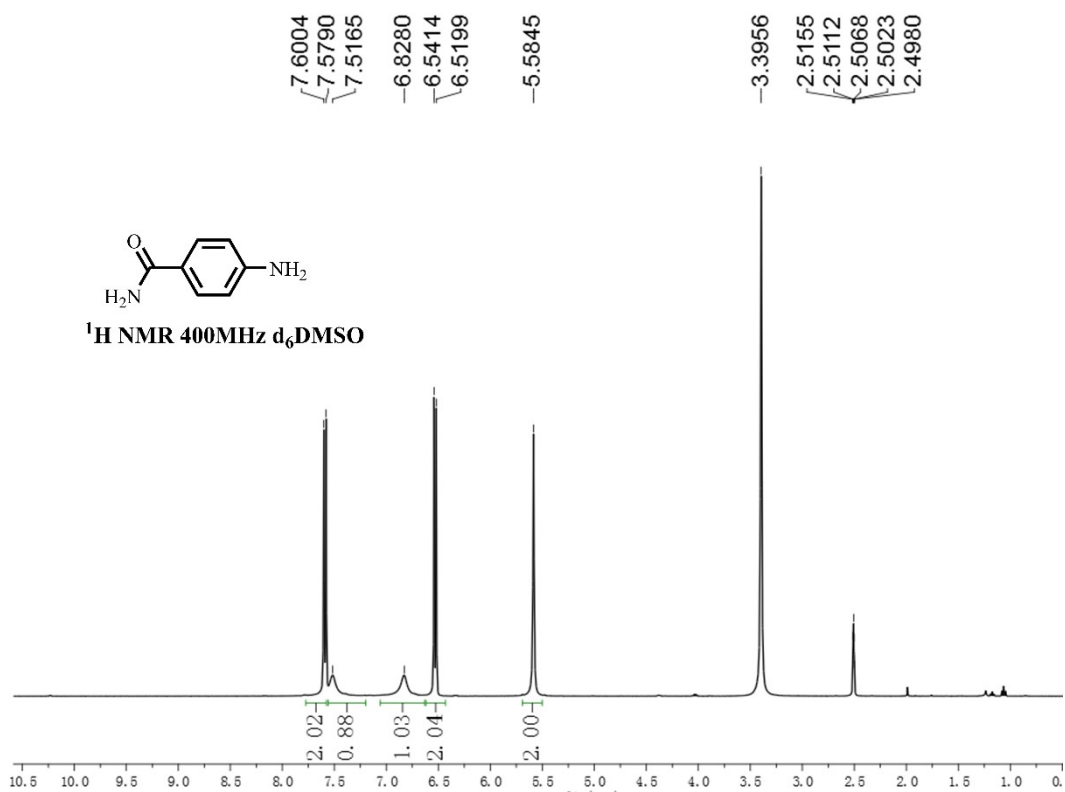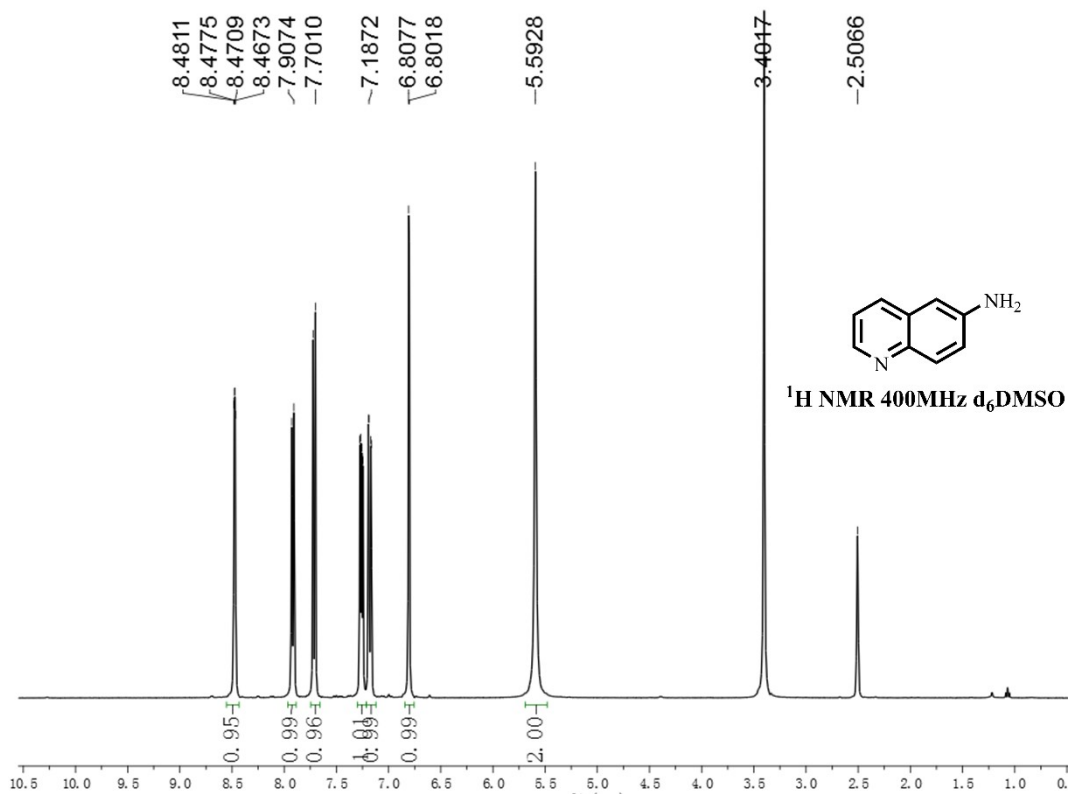

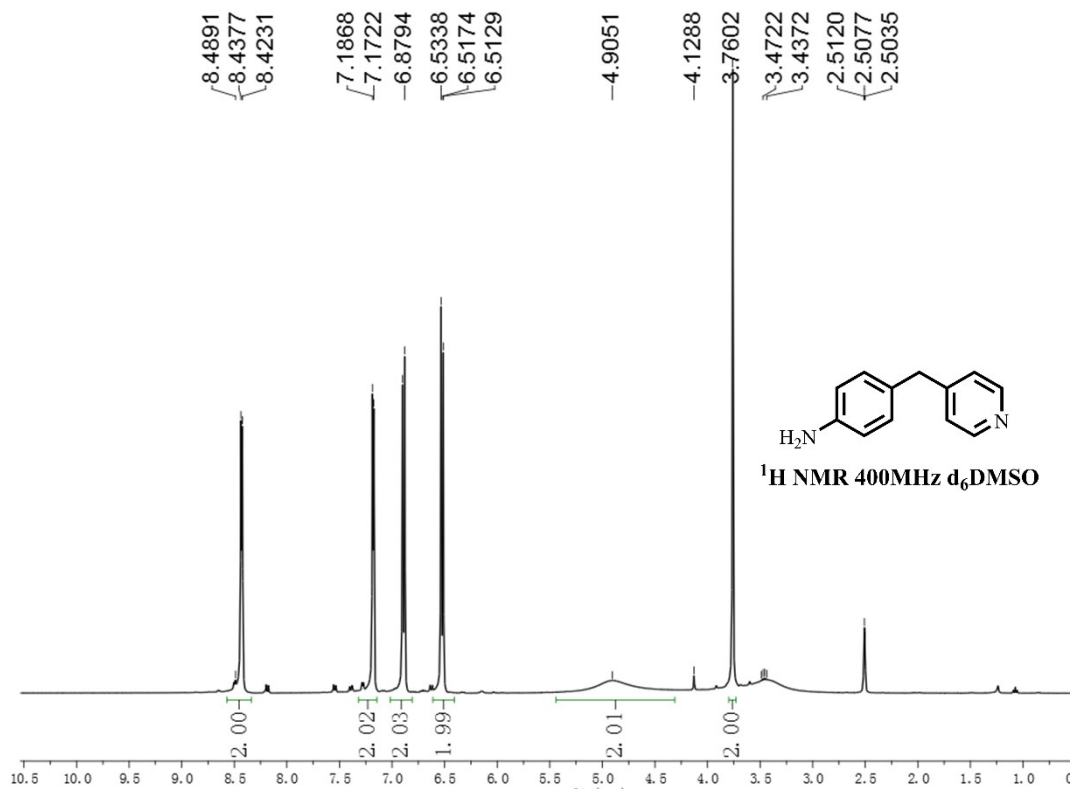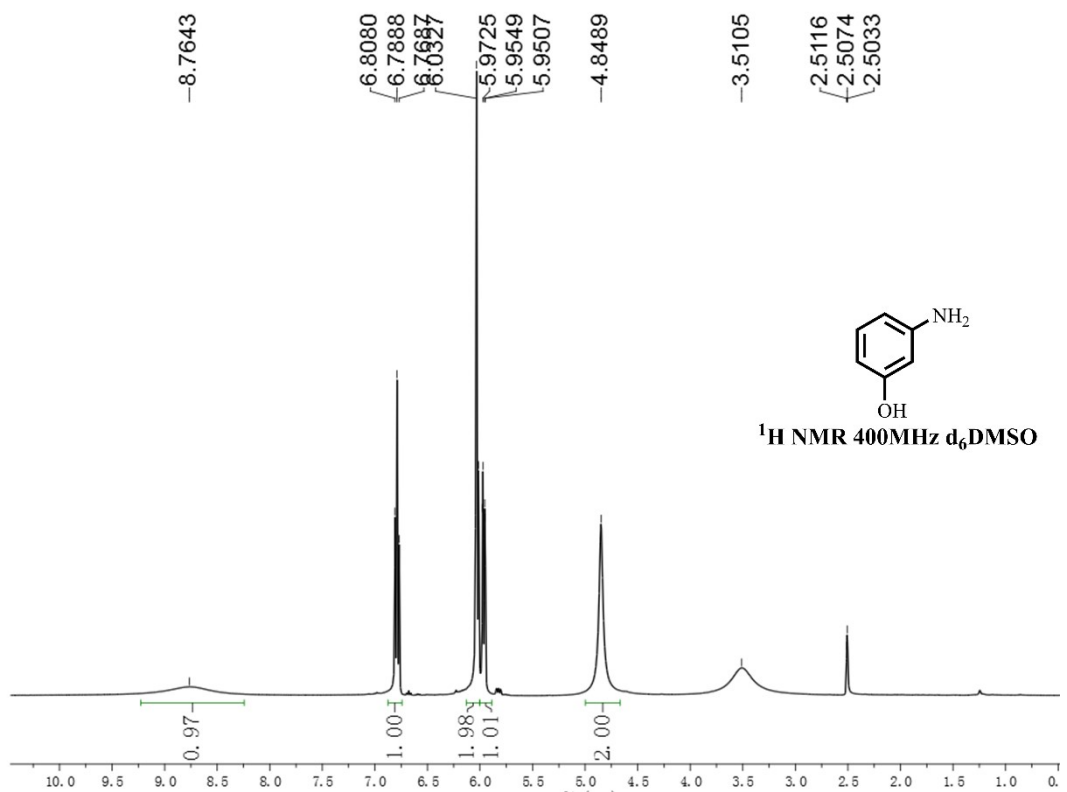

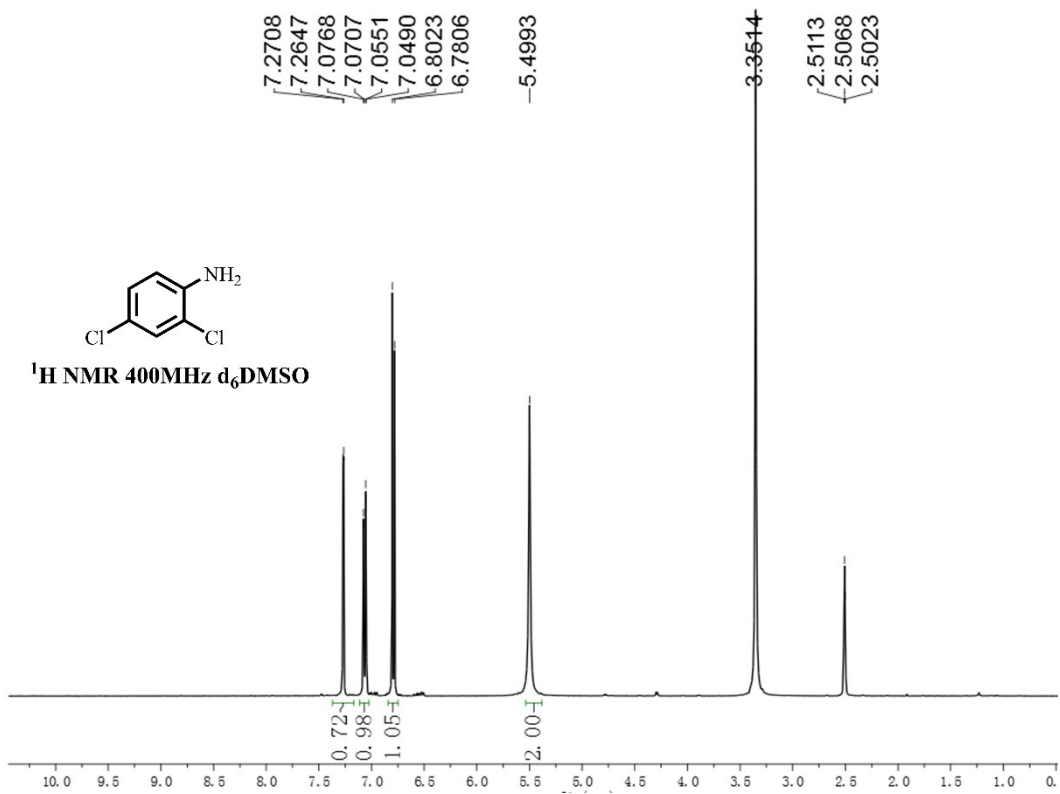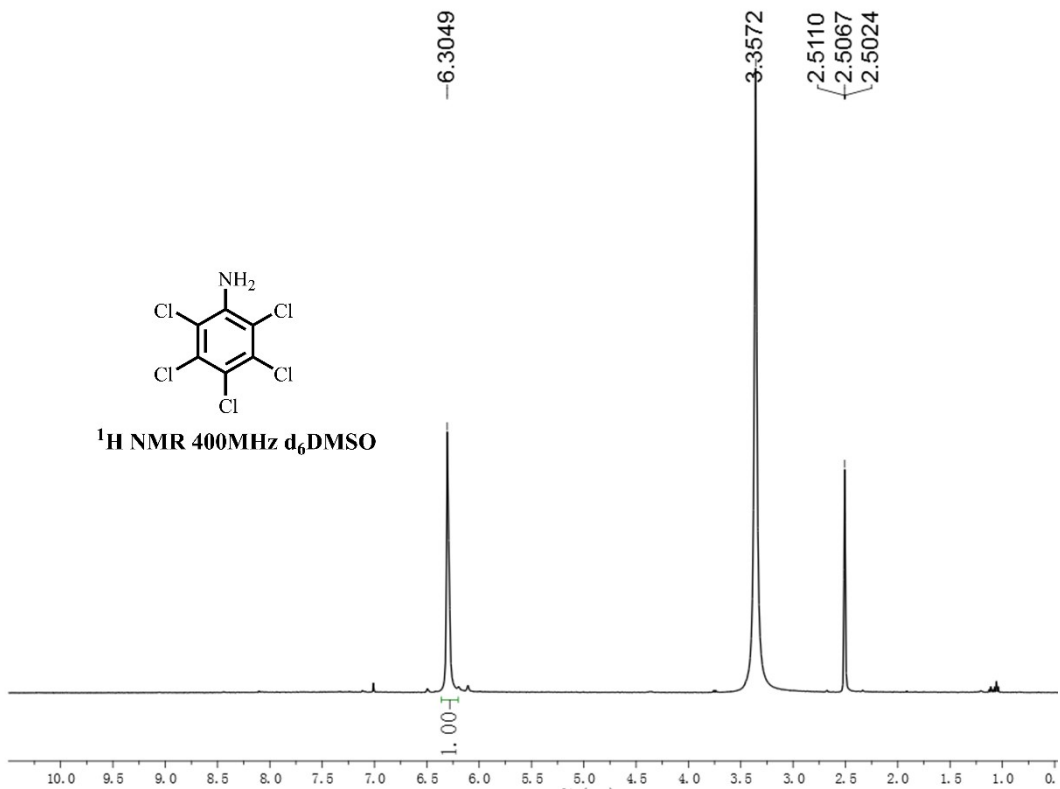

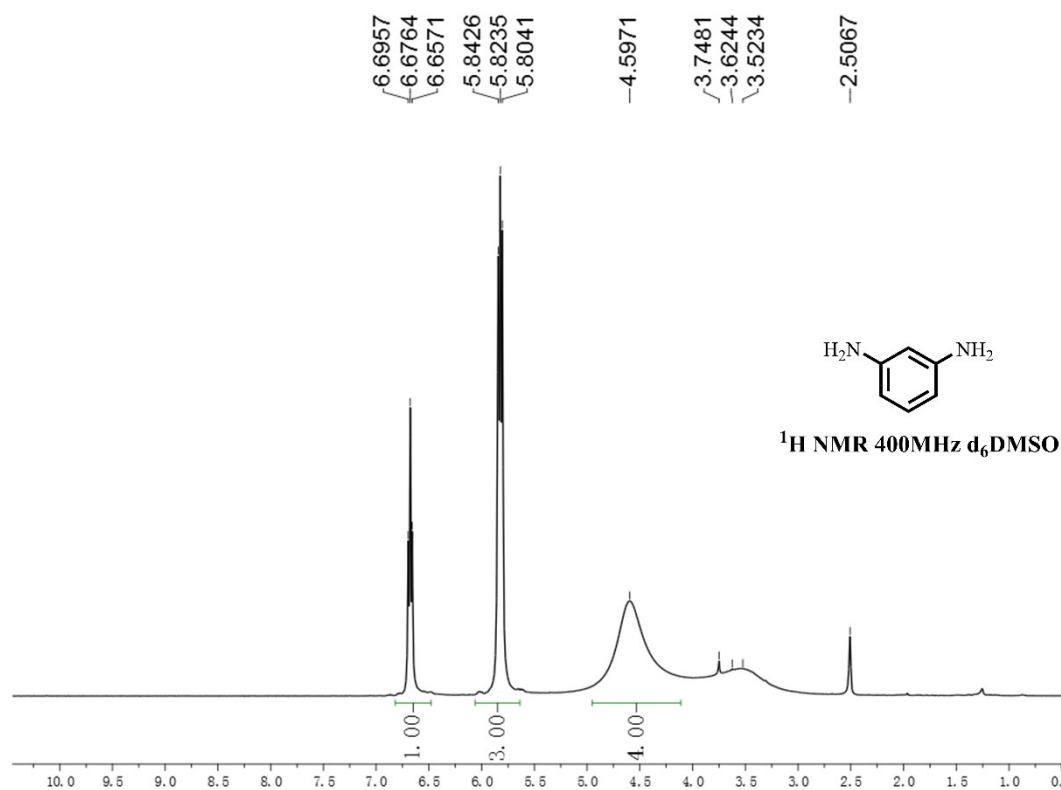

Figure S3.  $^1\text{H}$ -NMR (400 MHz,  $d^6$ -DMSO) reaction products.

## 2.7 Possible reaction mechanisms.

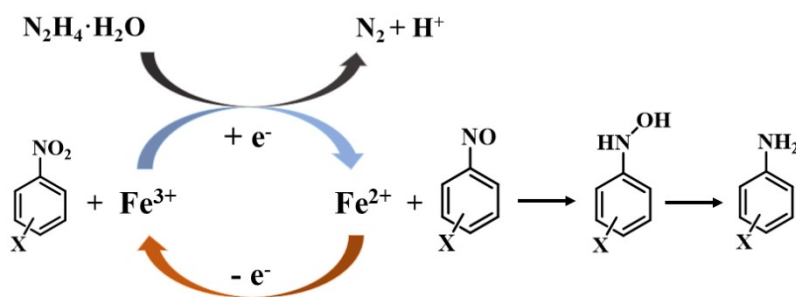

Figure S4. Possible mechanism of catalyst **L** for reducing nitrobenzene to aniline.

## 2.8 Reference

- [1] X. -L. Cui, Q. -L. Zhang, M. Tian, Z. -P. Dong. Facile fabrication of  $\gamma$ - $\text{Fe}_2\text{O}_3$ -nanoparticle modified N-doped porous carbon materials for the efficient hydrogenation of nitroaromatic compounds. *N. J. Chem*, 2017, **41** (18), 10165-10173.
